# Supplementary material
Source: publisher figshare collection journal article supplement (https://gsajournals.figshare.com/ndownloader/files/16870628)
Supplement: Supplementary file 4 [file 16870628]

## Report

|                            | colinus_virginianus_13May2017_V3Fw6.polished.renamed | GCA_000599465.2_ASM59946v2_genomic |
|----------------------------|------------------------------------------------------|------------------------------------|
| # contigs (>= 0 bp)        | 1512                                                 | 42369                              |
| # contigs (>= 1000 bp)     | 1504                                                 | 42369                              |
| # contigs (>= 5000 bp)     | 137                                                  | 18177                              |
| # contigs (>= 10000 bp)    | 63                                                   | 10766                              |
| # contigs (>= 25000 bp)    | 52                                                   | 3662                               |
| # contigs (>= 50000 bp)    | 41                                                   | 1490                               |
| Total length (>= 0 bp)     | 866267420                                            | 1254146751                         |
| Total length (>= 1000 bp)  | 866261026                                            | 1254146751                         |
| Total length (>= 5000 bp)  | 863740349                                            | 1204789361                         |
| Total length (>= 10000 bp) | 863256341                                            | 1148268589                         |
| Total length (>= 25000 bp) | 863090385                                            | 1038988101                         |
| Total length (>= 50000 bp) | 862693496                                            | 963839697                          |
| # contigs                  | 1511                                                 | 42369                              |
| Largest contig             | 180865729                                            | 14292544                           |
| Total length               | 866266924                                            | 1254146751                         |
| GC (%)                     | 41.20                                                | 42.66                              |
| N50                        | 66809948                                             | 2042136                            |
| N75                        | 22391474                                             | 65386                              |
| L50                        | 4                                                    | 150                                |
| L75                        | 10                                                   | 1080                               |
| # N's per 100 kbp          | 1363.35                                              | 9560.09                            |

All statistics are based on contigs of size >= 500 bp, unless otherwise noted (e.g., "# contigs (>= 0 bp)" and "Total length (>= 0 bp)" include all contigs).

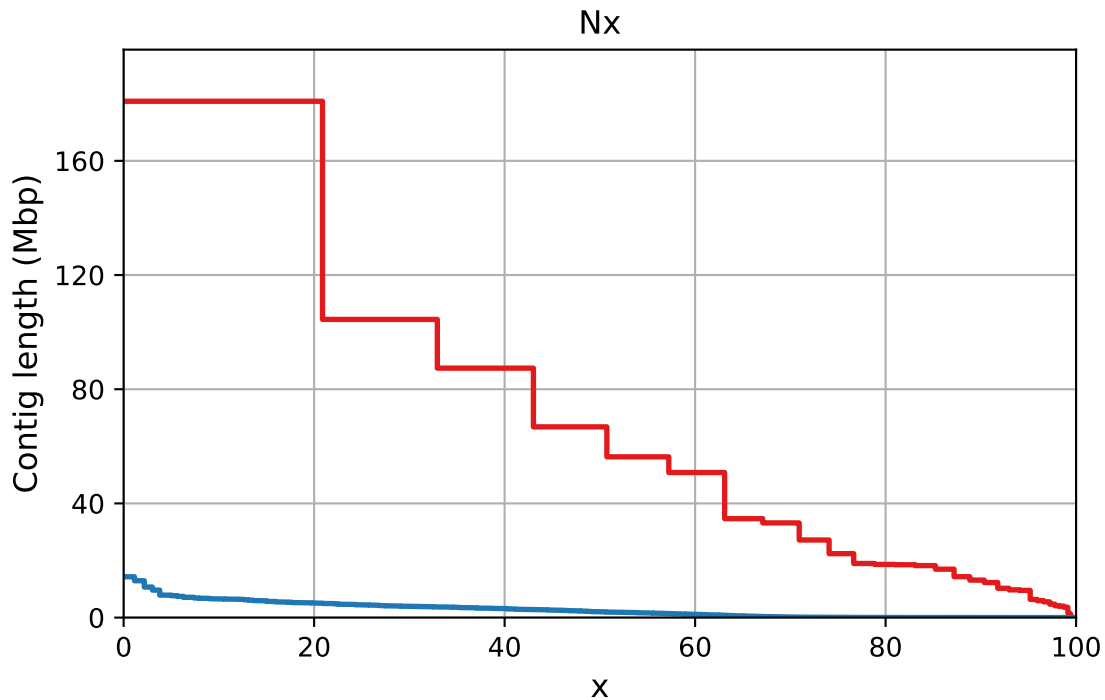

s\_virginianus\_13May2017\_V3Fw6.polished.renamed

— GCA\_000599465.2\_ASM59946

Cumulative length

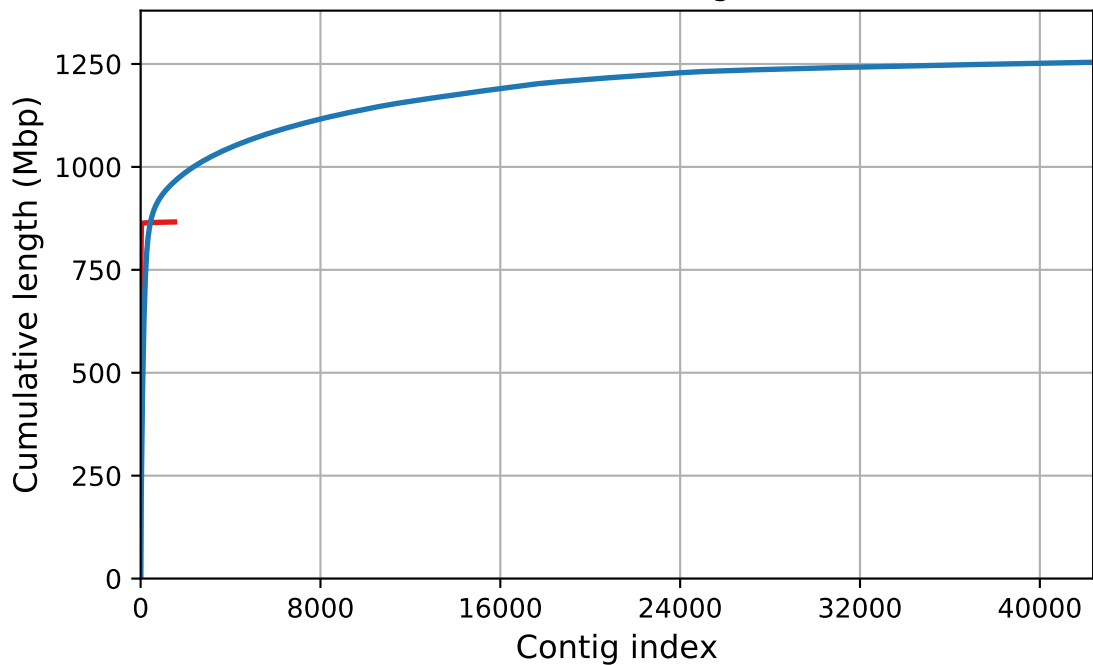

s\_virginianus\_13May2017\_V3Fw6.polished.renamed

— GCA\_000599465.2\_ASM599465.2

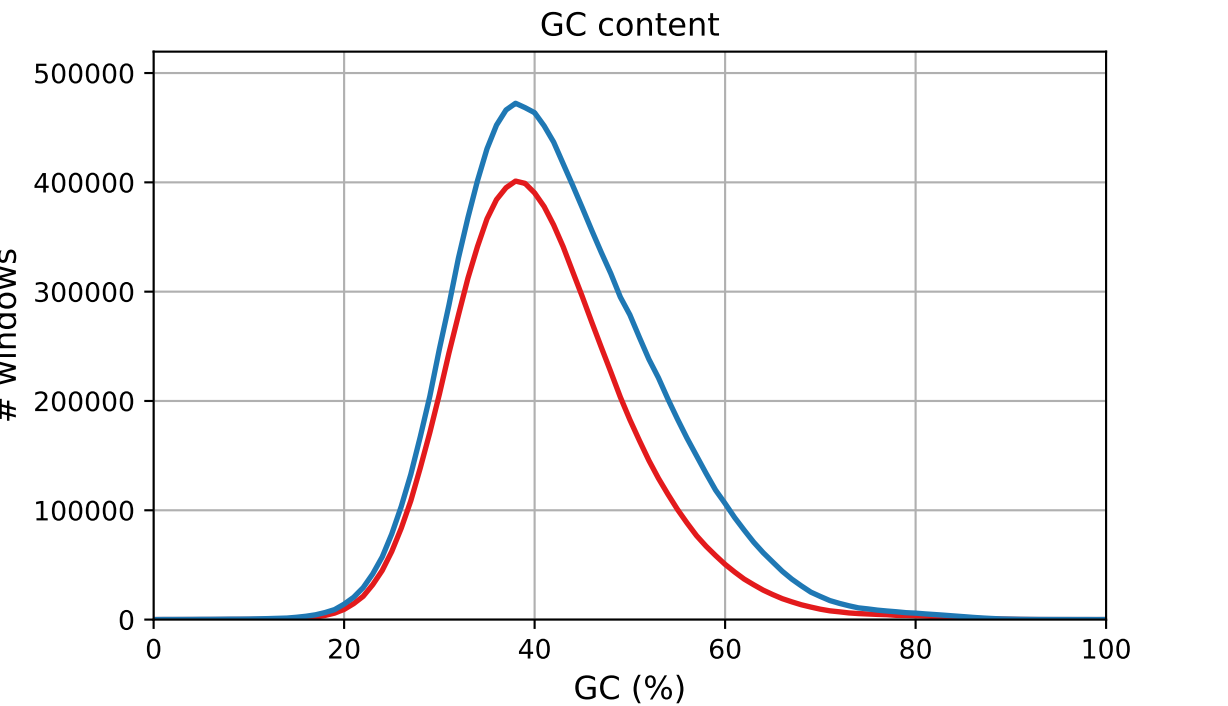

s\_virginianus\_13May2017\_V3Fw6.polished.renamed

— GCA\_000599465.2\_ASM59946

colinus\_virginianus\_13May2017\_V3Fw6.polished.renamed GC content

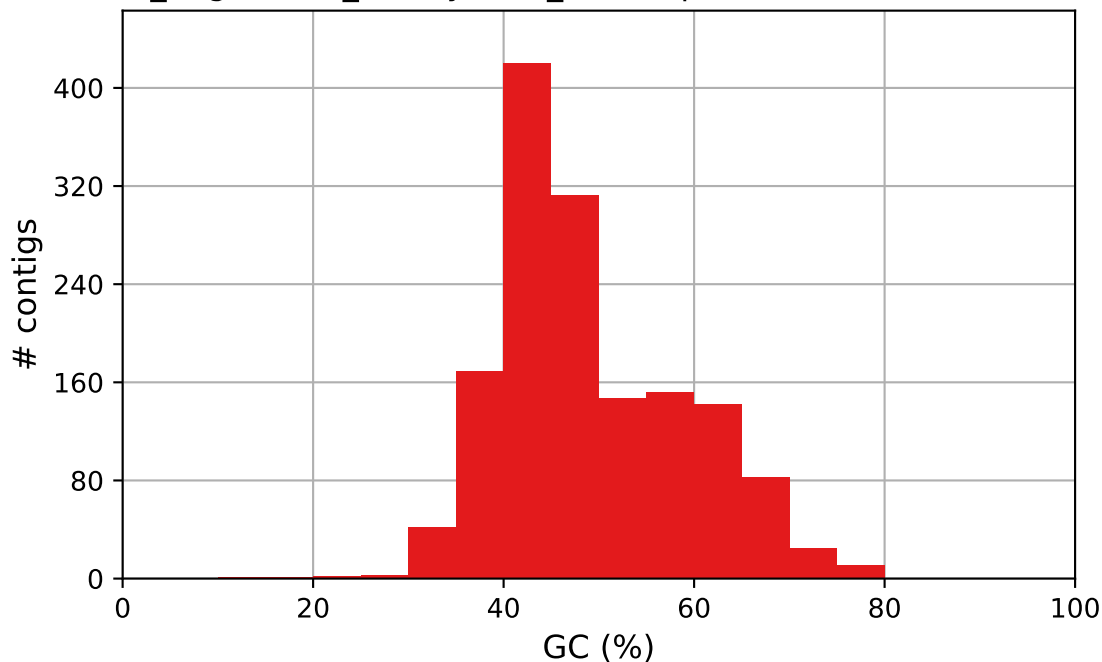

colinus\_virginianus\_13May2017\_V3Fw6.polished.renamed

GCA\_000599465.2\_ASM59946v2\_genomic GC content

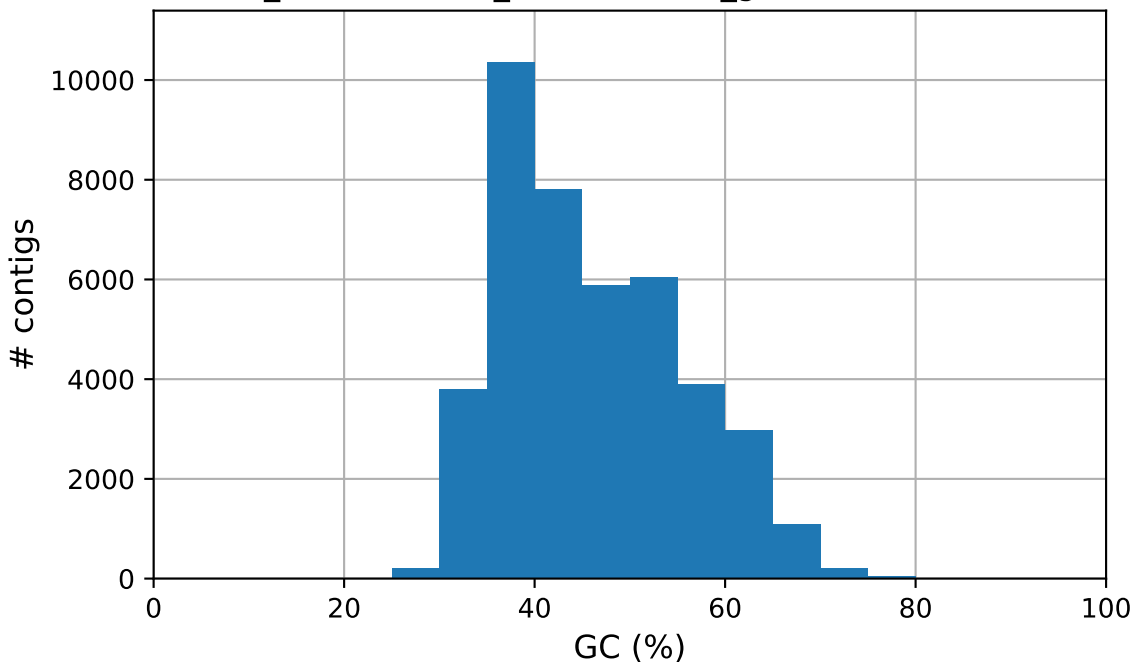

GCA\_000599465.2\_ASM59946v2\_genomic
