# Supplementary material
Source: publisher figshare collection journal article supplement (https://gsajournals.figshare.com/ndownloader/files/16870628)

# GC content

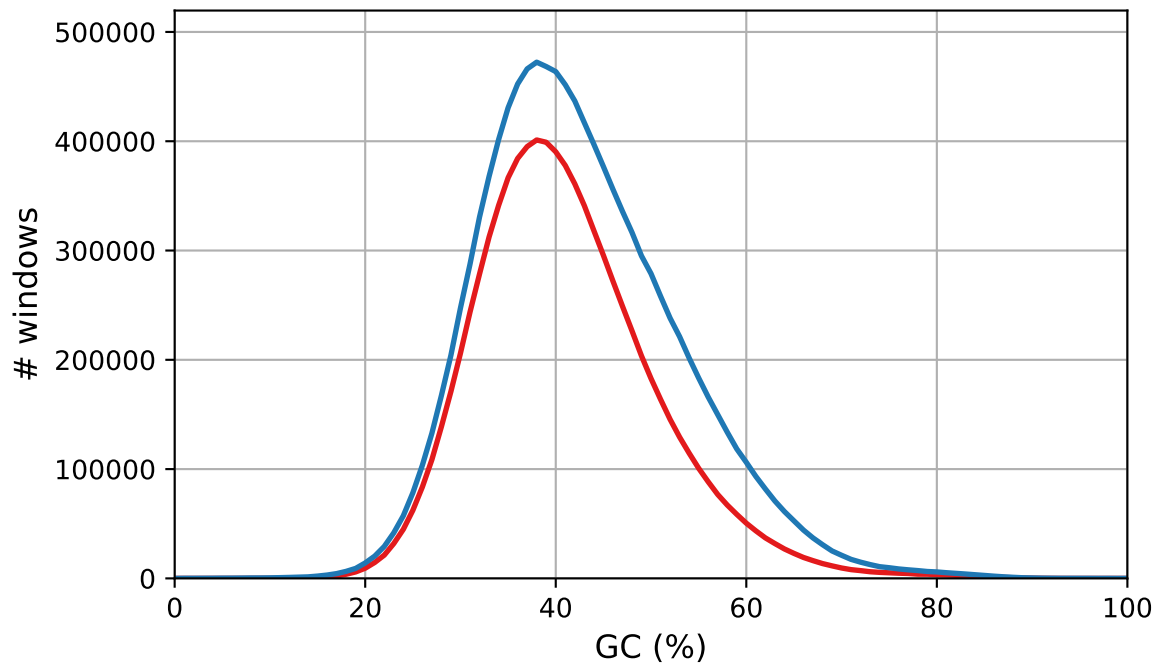

colinus\_virginianus\_13May2017\_V3Fw6.polished.renamed      GCA\_000599465.2\_ASM59946v2\_genomic

Supplement: Supplementary file 5 [file 16870628]

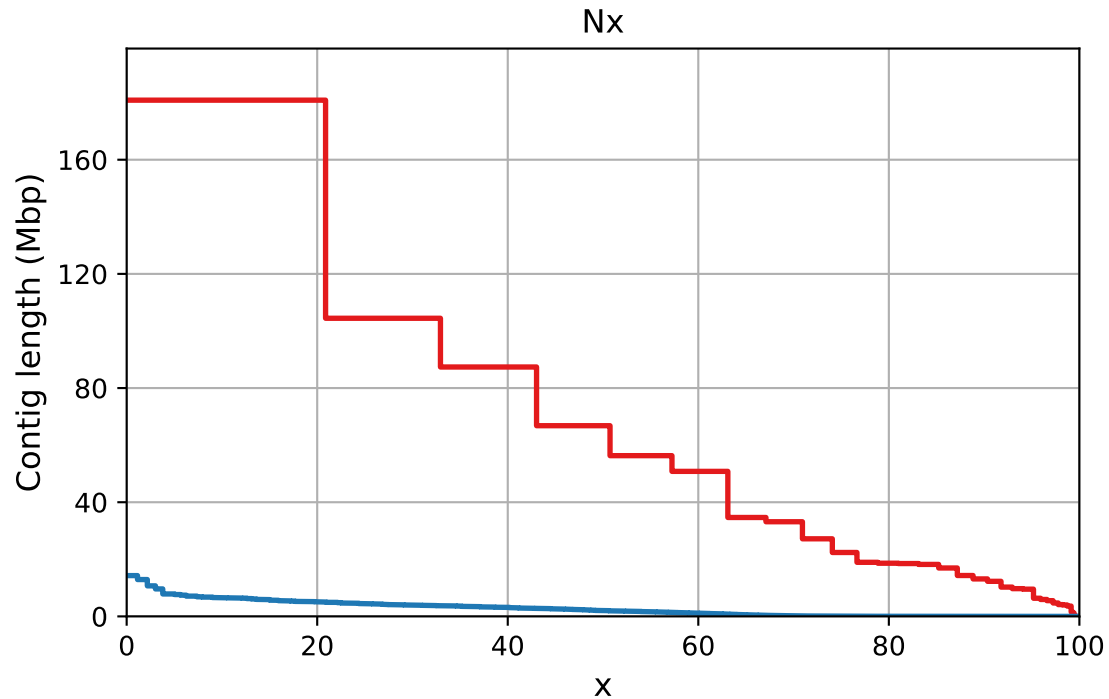

colinus\_virginianus\_13May2017\_V3Fw6.polished.renamed      GCA\_000599465.2\_ASM59946v2\_genomic

Supplement: Supplementary file 6 [file 16870628]

colinus\_virginianus\_13May2017\_V3Fw6.polished.renamed GC content

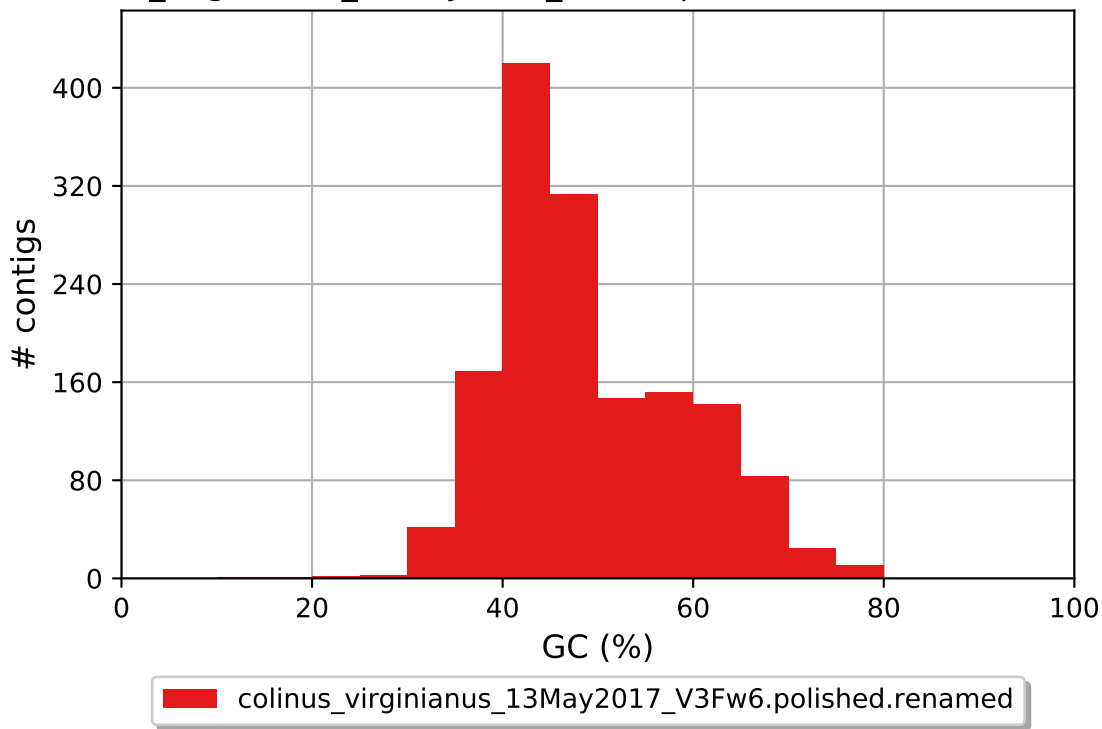

Supplement: Supplementary file 7 [file 16870628]

GCA\_000599465.2\_ASM59946v2\_genomic GC content

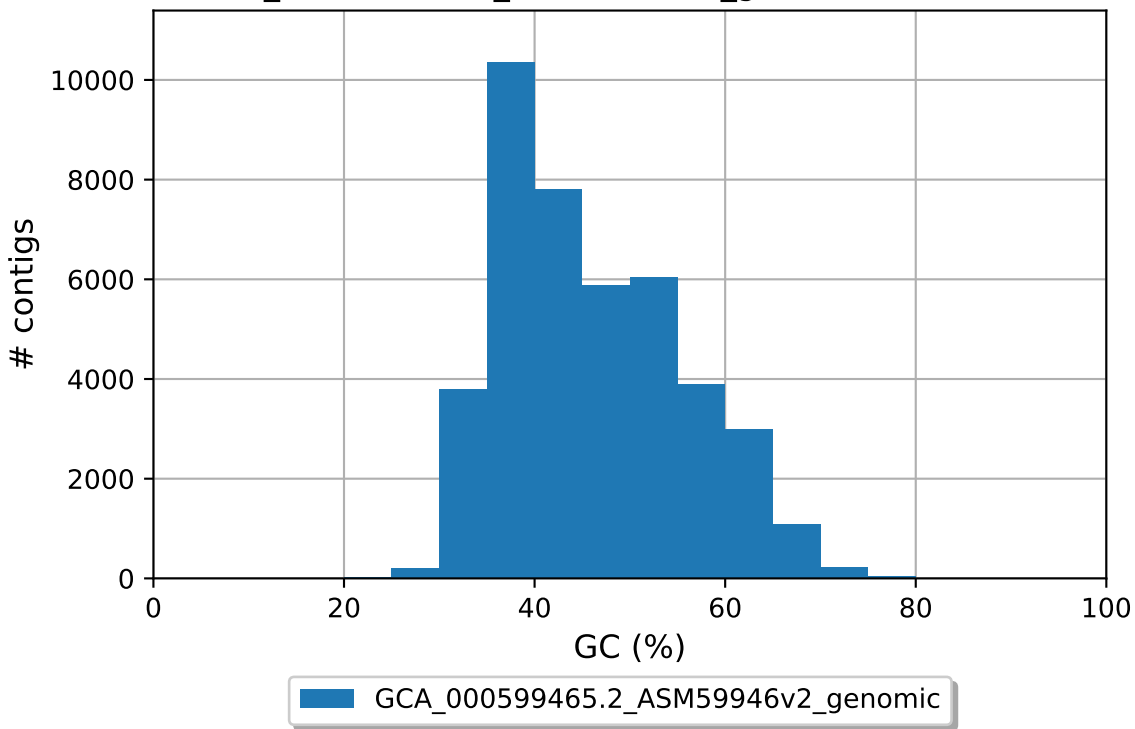

Supplement: Supplementary file 8 [file 16870628]

Cumulative length

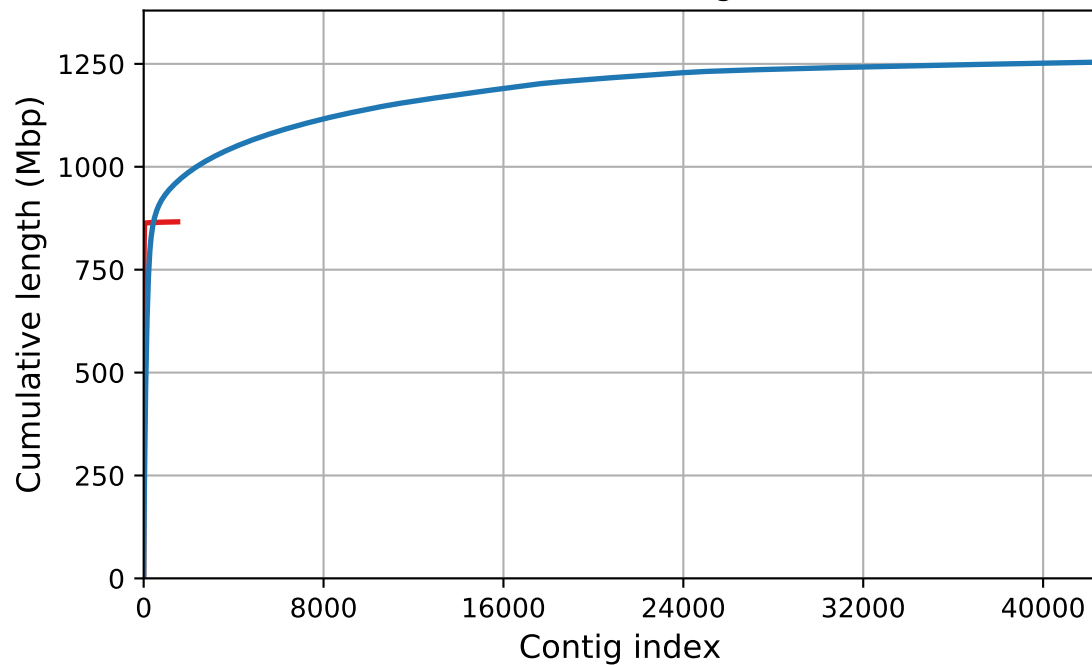

colinus\_virginianus\_13May2017\_V3Fw6.polished.renamed      GCA\_000599465.2\_ASM59946v2\_genomic

Supplement: Supplementary file 10 [file 16870628]
